# Supplementary material for: Structural, magnetic and dielectric properties of two novel mixed-valence iron(ii)–iron(iii) metal formate frameworks
Source: Royal Society of Chemistry journal article supplement (doi:10.1039/c5tc03683f), 2016-01-01
Supplement: c5tc03683f1.pdf [file c5tc03683f1.pdf]

## " Structural, Magnetic and Dielectric Properties of Two Novel Mixed-Valence Iron(II)-Iron(III) Metal Formate Frameworks "

by M. Maczka *et al*

Table S1. Experimental details for  $[\text{C}_2\text{H}_5\text{NH}_3][\text{Fe}^{\text{II}}\text{Fe}^{\text{III}}(\text{HCOO})_6]$ , **2**, and  $[(\text{C}_2\text{H}_5)_2\text{NH}_2][\text{Fe}^{\text{II}}\text{Fe}^{\text{III}}(\text{HCOO})_6]$ , **3**.

|                                                       | <b>3</b>                                              | <b>2</b>                                           |
|-------------------------------------------------------|-------------------------------------------------------|----------------------------------------------------|
| <i>Crystal data</i>                                   |                                                       |                                                    |
| Chemical formula                                      | $\text{C}_{10}\text{H}_{18}\text{Fe}_2\text{NO}_{12}$ | $\text{C}_8\text{H}_{14}\text{Fe}_2\text{NO}_{12}$ |
| $M_r$                                                 | 455.95                                                | 427.90                                             |
| Crystal system, space group                           | Trigonal, $P-31c$                                     | Trigonal, $P-31c$                                  |
| Temperature (K)                                       | 260                                                   | 298                                                |
| $a, c$ (Å)                                            | 8.4483 (2), 13.7058 (4)                               | 8.2294(2), 14.1221(5)                              |
| $V$ (Å <sup>3</sup> )                                 | 847.18 (5)                                            | 828.26 (5)                                         |
| $Z$                                                   | 2                                                     | 2                                                  |
| Radiation type                                        | Mo $K\alpha$                                          | Mo $K\alpha$                                       |
| $\mu$ (mm <sup>-1</sup> )                             | 1.77                                                  | 1.81                                               |
| Crystal size (mm)                                     | $0.10 \times 0.05 \times 0.04$                        | $0.10 \times 0.08 \times 0.07$                     |
| <i>Data collection</i>                                |                                                       |                                                    |
| $T_{\text{min}}, T_{\text{max}}$                      | 0.925, 1.000                                          | 0.874, 1.000                                       |
| No. of measured, independent and observed $[I > 542,$ | 10788,                                                | 8996,                                              |
|                                                       |                                                       | 527,                                               |

|                                                            |       |       |
|------------------------------------------------------------|-------|-------|
| $2\sigma(I)$ reflections                                   | 482   | 459   |
| $R_{\text{int}}$                                           | 0.033 | 0.032 |
| $(\sin \theta/\lambda)_{\text{max}}$ ( $\text{\AA}^{-1}$ ) | 0.610 | 0.610 |

*Refinement*

|                                                                            |                                  |                                  |
|----------------------------------------------------------------------------|----------------------------------|----------------------------------|
| $R[F^2 > 2\sigma(F^2)], wR(F^2), S$                                        | 0.029, 0.079, 1.08               | 0.038, 0.113, 1.09               |
| No. of reflections                                                         | 542                              | 527                              |
| No. of parameters                                                          | 43                               | 39                               |
| No. of restraints                                                          | 4                                | 2                                |
| H-atom treatment                                                           | H-atom parameters<br>constrained | H-atom parameters<br>constrained |
| $\Delta\rho_{\text{max}}, \Delta\rho_{\text{min}}$ ( $\text{e \AA}^{-3}$ ) | 0.55, -0.35                      | 1.00, -0.54                      |

---

Table S2. IR frequencies (in  $\text{cm}^{-1}$ ) of **2** and **3** together with the suggested assignments.<sup>a</sup>

| <b>3</b> |               | <b>2</b> |               | Assignment                                      |
|----------|---------------|----------|---------------|-------------------------------------------------|
| 298 K    | 4 K           | 298 K    | 4 K           |                                                 |
| 3354sh   | 3352sh        |          |               | $\nu(\text{NH}_3)$ and $\nu(\text{NH}_2)$       |
| 3305w    | 3302m         | 3276sh   | 3277sh        | $\nu(\text{NH}_3)$ and $\nu(\text{NH}_2)$       |
| 3213sh   | 3207sh        | 3201w    | 3216m, 2196sh | $\nu(\text{NH}_3)$ and $\nu(\text{NH}_2)$       |
| 3175m    | 3171m         | 3133vw   | 3127w         | $\nu(\text{NH}_3)$ and $\nu(\text{NH}_2)$       |
| 3106m    | 3071m, 3037m  | 3080w    | 3077m         | $\nu(\text{NH}_3)$ and $\nu(\text{NH}_2)$       |
| 3012w    | 3007m         | 3019vw   | 3016w         | $\nu(\text{CH}_3)$ and $\nu(\text{CH}_2)$       |
| 3001w    | 2999m         | 3000vw   | 2996w         | $\nu(\text{CH}_3)$ and $\nu(\text{CH}_2)$       |
| 2983w    | 2979w         | 2987vw   | 2982w         | $\nu(\text{CH}_3)$ and $\nu(\text{CH}_2)$       |
| 2971w    | 2972w         | 2969vw   | 2977w         | $\nu(\text{CH}_3)$ and $\nu(\text{CH}_2)$       |
| 2957w    | 2959w         |          |               | $\nu(\text{CH}_3)$ and $\nu(\text{CH}_2)$       |
| 2942w    | 2938m         | 2946w    |               | $\nu(\text{CH}_3)$ and $\nu(\text{CH}_2)$       |
|          |               |          | 2929m         | $\nu(\text{NH}_3)$                              |
| 2910vw   | 2919sh, 2904w |          |               | $\nu(\text{CH}_3)$ and $\nu(\text{CH}_2)$       |
| 2898vw   | 2898w         |          |               | $\nu(\text{CH}_3)$ and $\nu(\text{CH}_2)$       |
| 2875m    | 2882m         | 2881w    | 2884m, 2877sh | $\nu_1(\text{HCOO}^-)$                          |
| 2864sh   | 2868m, 2857m  |          |               | $\nu_1(\text{HCOO}^-)$                          |
| 2826w    | 2830w, 2818sh |          |               | overtone                                        |
|          | 2813w         |          |               |                                                 |
|          |               | 1626sh   | 1628sh        | $\delta_{\text{as}}(\text{NH}_3)$               |
| 1586s    | 1587s, 1570sh | 1585s    | 1589s, 1574s  | $\nu_4(\text{HCOO}^-)$                          |
|          | 1560sh        |          |               |                                                 |
|          |               | 1485w    | 1487w         | $\delta_{\text{s}}(\text{NH}_3)$                |
| 1473vw   | 1476w, 1464vw | 1463w    | 1458w         | $\delta(\text{CH}_3)$ and $\delta(\text{CH}_2)$ |

|        |                |        |              |  |                                                                 |
|--------|----------------|--------|--------------|--|-----------------------------------------------------------------|
|        | 1459vw         |        |              |  |                                                                 |
| 1453w  | 1450m          | 1451w  | 1447w        |  | $\delta(\text{CH}_3)$ and $\delta(\text{CH}_2)$                 |
| 1447w  | 1441m          | 1447w  | 1444m        |  | $\delta(\text{CH}_3)$ and $\delta(\text{CH}_2)$                 |
|        | 1425w          |        |              |  | $\omega(\text{NH}_2)$                                           |
|        | 1408vw         |        |              |  | $\tau(\text{NH}_2)$ and $\delta_s(\text{CH}_3)$                 |
| 1394m  | 1395m          | 1386s  | 1395s, 1388s |  | $\nu_5(\text{HCOO}^-)$                                          |
| 1383m  | 1387m          |        |              |  | $\nu_5(\text{HCOO}^-)$                                          |
| 1378m  | 1382m, 1380m   |        |              |  | $\nu_5(\text{HCOO}^-)$                                          |
|        | 1374m          |        |              |  | $\nu_5(\text{HCOO}^-)$                                          |
|        | 1366vw         |        | 1367sh       |  | $\nu_2(\text{HCOO}^-)$                                          |
| 1346s  | 1349s, 1343m   | 1347s  | 1348s        |  | $\nu_2(\text{HCOO}^-)$                                          |
|        | 1334s          |        |              |  |                                                                 |
|        |                | 1328sh | 1333sh       |  | $\nu_2(\text{HCOO}^-)$                                          |
| 1261sh | 1269w          | 1222w  | 1227w        |  | $\rho(\text{CH}_3)$ and $\rho(\text{CH}_2)$                     |
| 1195w  | 1202w          | 1194w  | 1196w        |  | $\rho(\text{CH}_3)$                                             |
| 1158vw | 1167vw, 1160vw |        |              |  | overtones                                                       |
|        | 1155vw         |        |              |  |                                                                 |
| 1072w  | 1073w          |        |              |  | $\rho(\text{CH}_3)$                                             |
| 1058w  | 1061sh, 1057w  |        |              |  | $\nu_6(\text{HCOO}^-)$                                          |
| 1055w  | 1057m, 1048sh  | 1051w  | 1057w        |  | $\nu_6(\text{HCOO}^-)$                                          |
|        |                |        | 1044w        |  | $\nu_{\text{as}}(\text{C-C})$ and $\nu_{\text{as}}(\text{C-N})$ |
| 1032w  | 1032vw         |        |              |  | $\rho(\text{CH}_3)$                                             |
| 1024w  | 1025w          |        |              |  | $\rho(\text{CH}_3)$                                             |
|        |                | 992w   | 998w         |  | $\rho(\text{NH}_3)$                                             |
|        |                | 964w   | 960w         |  | $\rho(\text{NH}_3)$                                             |
| 907vw  | 922w           |        |              |  | $\nu_{\text{as}}(\text{C-C})$ and $\nu_{\text{as}}(\text{C-N})$ |

|       |             |       |       |                                                   |
|-------|-------------|-------|-------|---------------------------------------------------|
| 896w  | 906w        |       |       | $\nu_{as}(\text{C-C})$ and $\nu_{as}(\text{C-N})$ |
|       |             | 870vw | 870vw | $\nu_s(\text{C-C})$ and $\nu_s(\text{C-N})$       |
|       | 866w        |       |       | $\rho(\text{NH}_2)$                               |
|       | 845vw       |       |       | $\nu_s(\text{C-C})$ and $\nu_s(\text{C-N})$       |
| 810m  | 817m, 808sh | 815m  | 820m  | $\nu_3(\text{HCOO}^-)$                            |
| 790w  | 788m        | 785m  | 781m  | $\nu_3(\text{HCOO}^-)$                            |
| 782w  | 782m        |       |       | $\nu_3(\text{HCOO}^-)$                            |
| 761w  | 762w        |       |       | overtone                                          |
| 665vw | 663vw, 639w |       |       | overtone                                          |

---

<sup>a</sup>Key: s, strong; m, medium; w, weak; vw, very weak; sh, shoulder

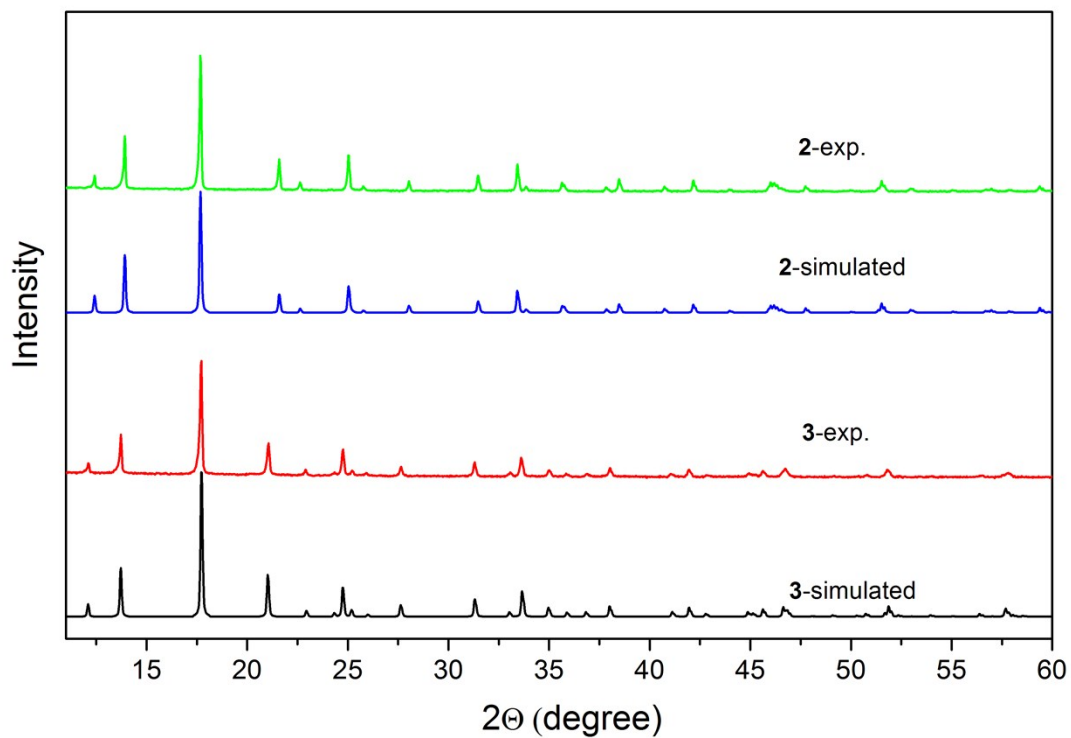

Figure S1. Powder XRD patterns for the as-prepared bulk samples of **2** and **3** with the calculated ones based on the single crystal structures at room temperatures.

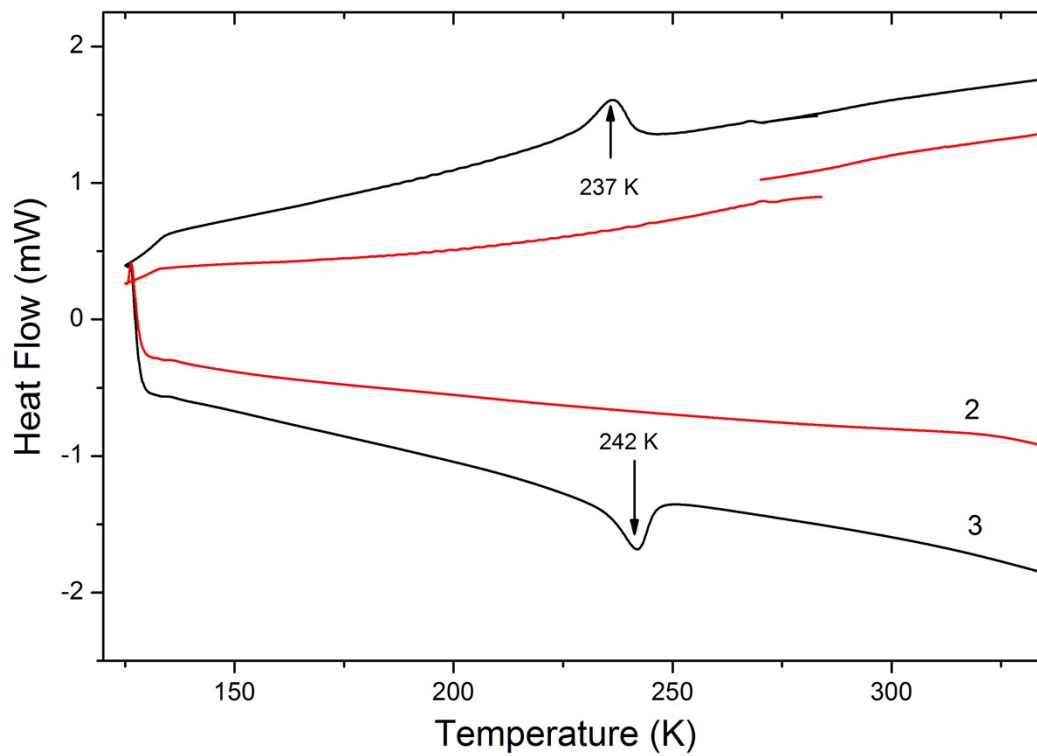

Figure S2. DSC traces for **2** and **3** in heating and cooling modes.

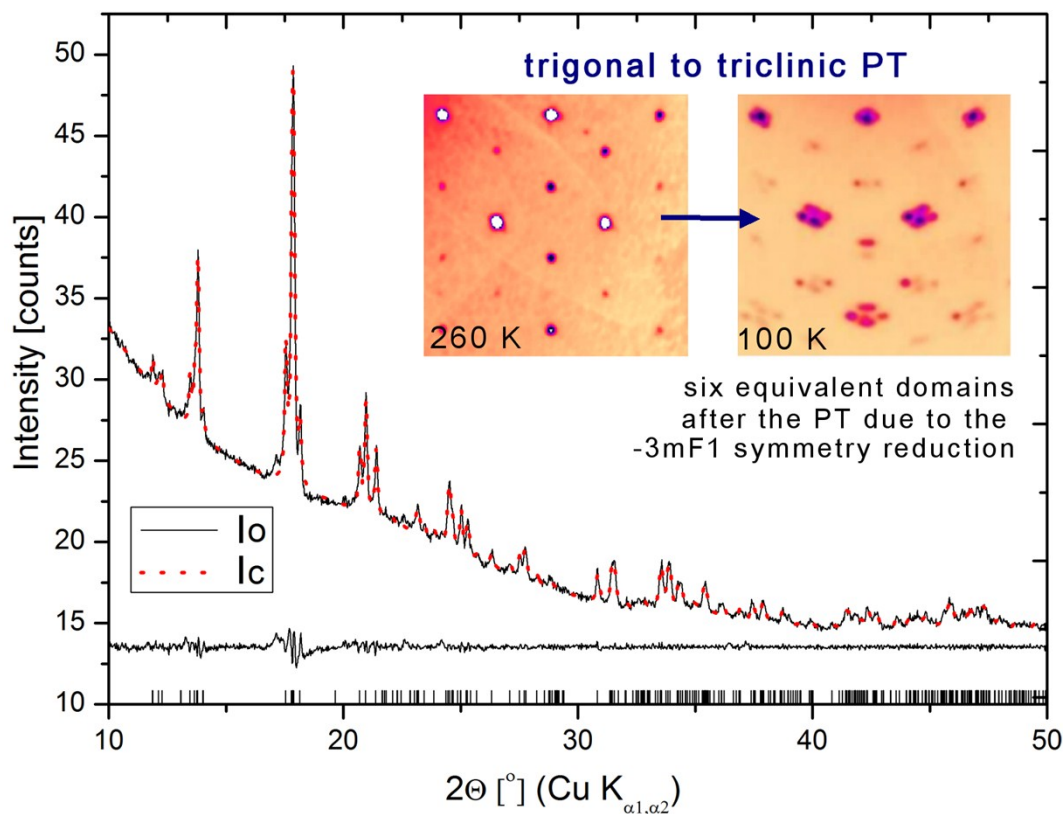

Figure S3. The results of the Le Bail fit of the XRD pattern in phase II of **3** using a triclinic unit cell with parameters  $a=8.307(1)\text{\AA}$ ,  $b=8.585(1)\text{\AA}$ ,  $c=13.540(1)\text{\AA}$ ,  $\alpha=89.5(1)$ ,  $\beta=89.3(1)$ ,  $\gamma=119.7(1)$ ,  $T=205\text{ K}$ . The residuals between the fits and the positions of the Bragg peaks are given in the bottom. In the inset the reciprocal space reconstruction of  $hk0$  layer in phase I and II are presented. The phase transition (PT) to the triclinic phase induces lattice twinning to six equivalent domains.  $I_o, I_c$ : observed and calculated intensity.



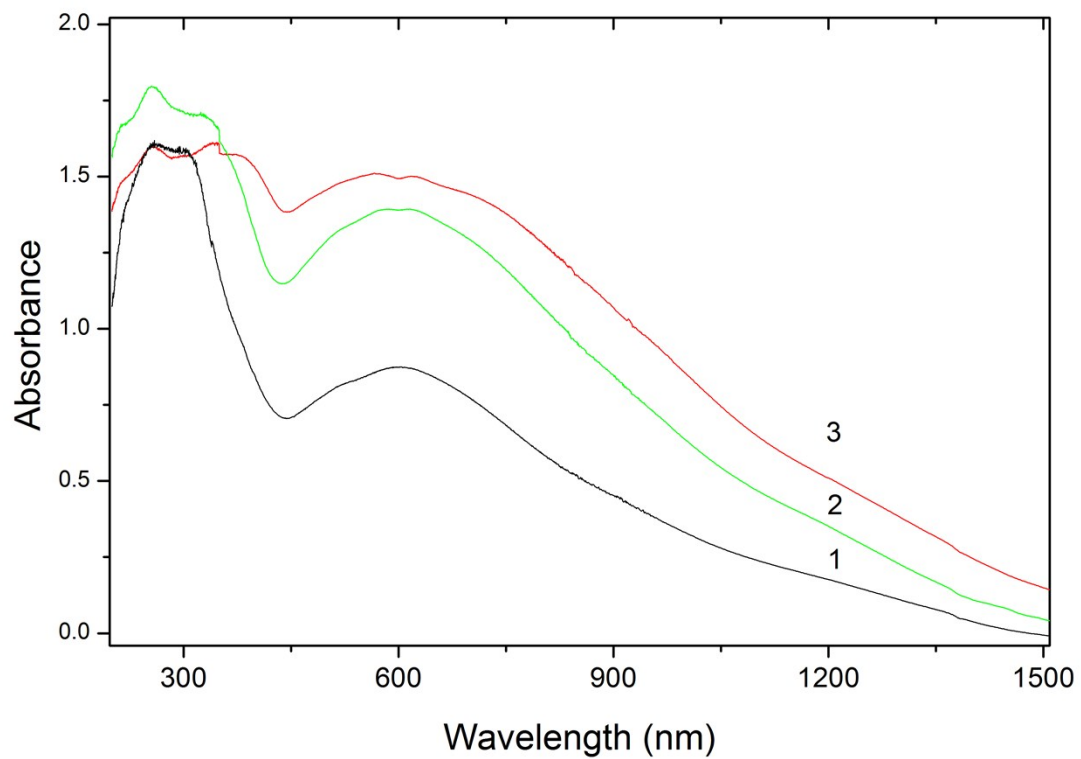

Figure S4. Diffuse reflectance spectra of **2** and **3**. For the comparison sake, spectrum of **1** is also shown.

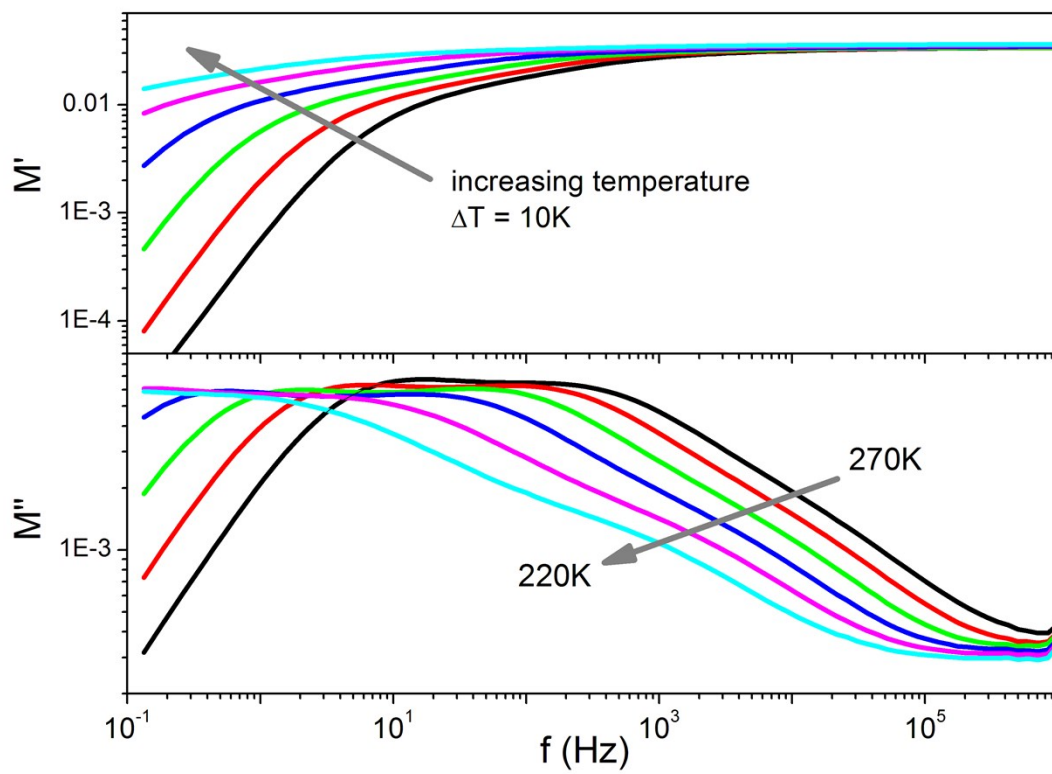

Figure S5. The frequency dependence of the real  $M'$  and imaginary  $M''$  parts of the electric modulus for **3**.

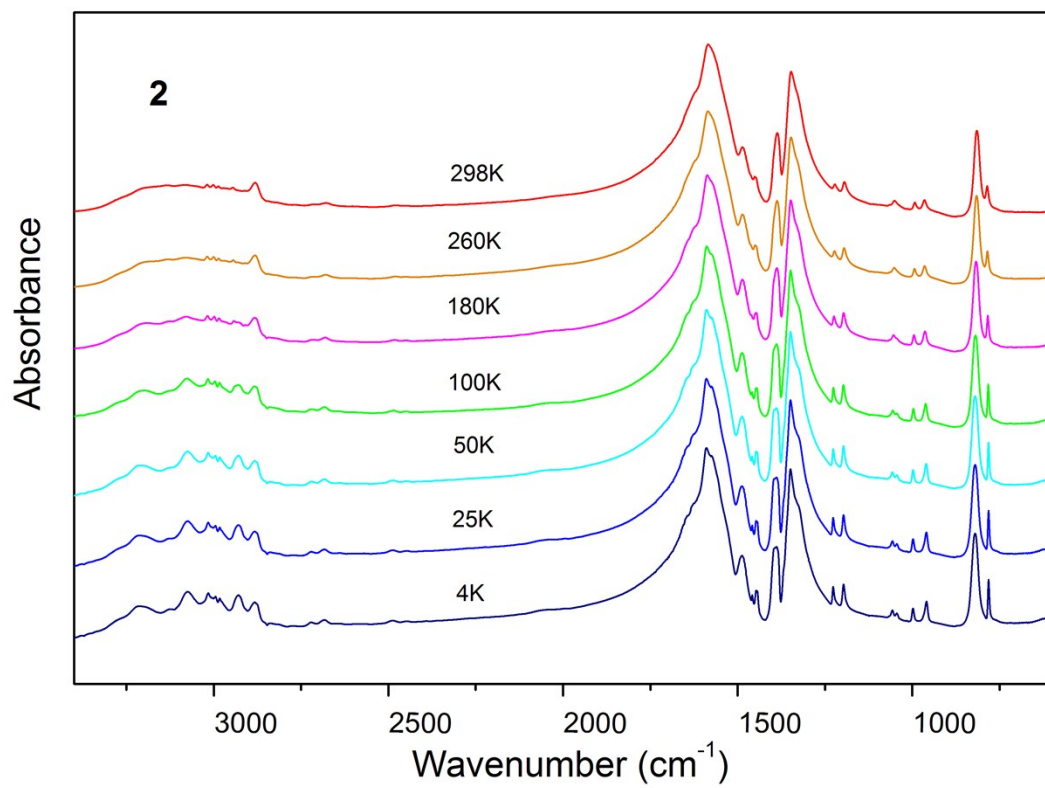

Figure S6. IR spectra of **2** recorded at various temperatures.

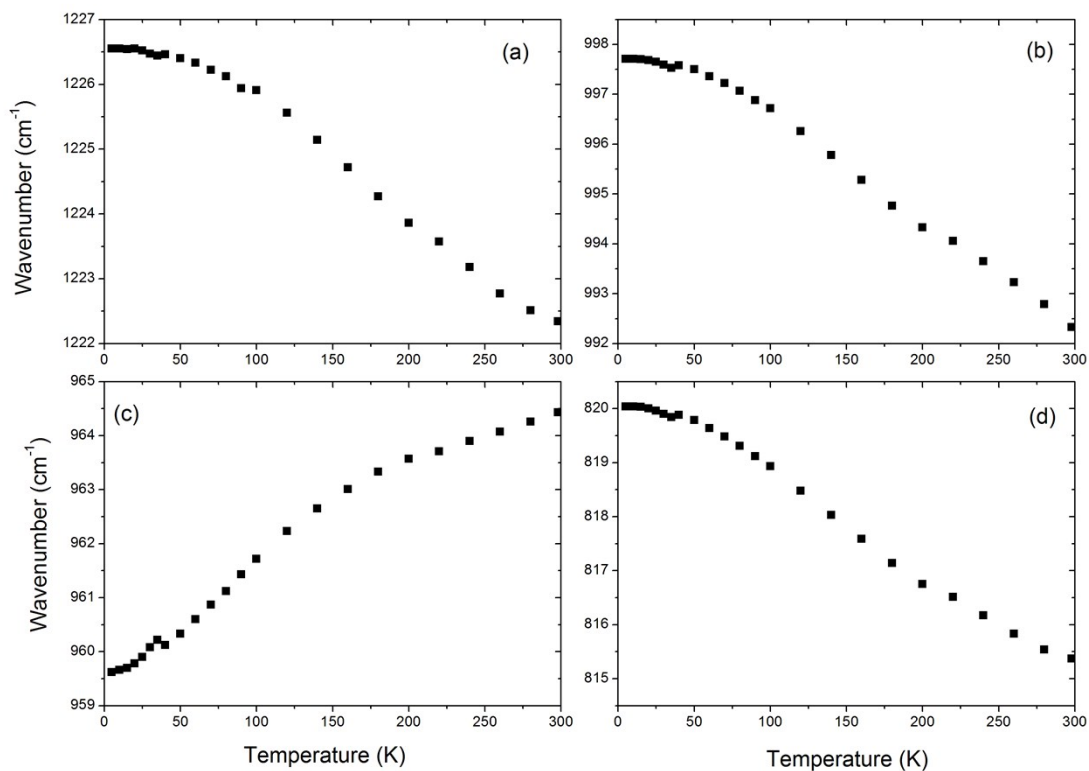

Figure S7. Temperature evolution of a few selected IR wavenumbers of **2** corresponding to (a)  $\rho(\text{CH}_3)$  and  $\rho(\text{CH}_2)$ ; (b)  $\rho(\text{NH}_3)$ ; (c)  $\rho(\text{NH}_3)$  and (d)  $\nu_3(\text{HCOO}^-)$  modes.

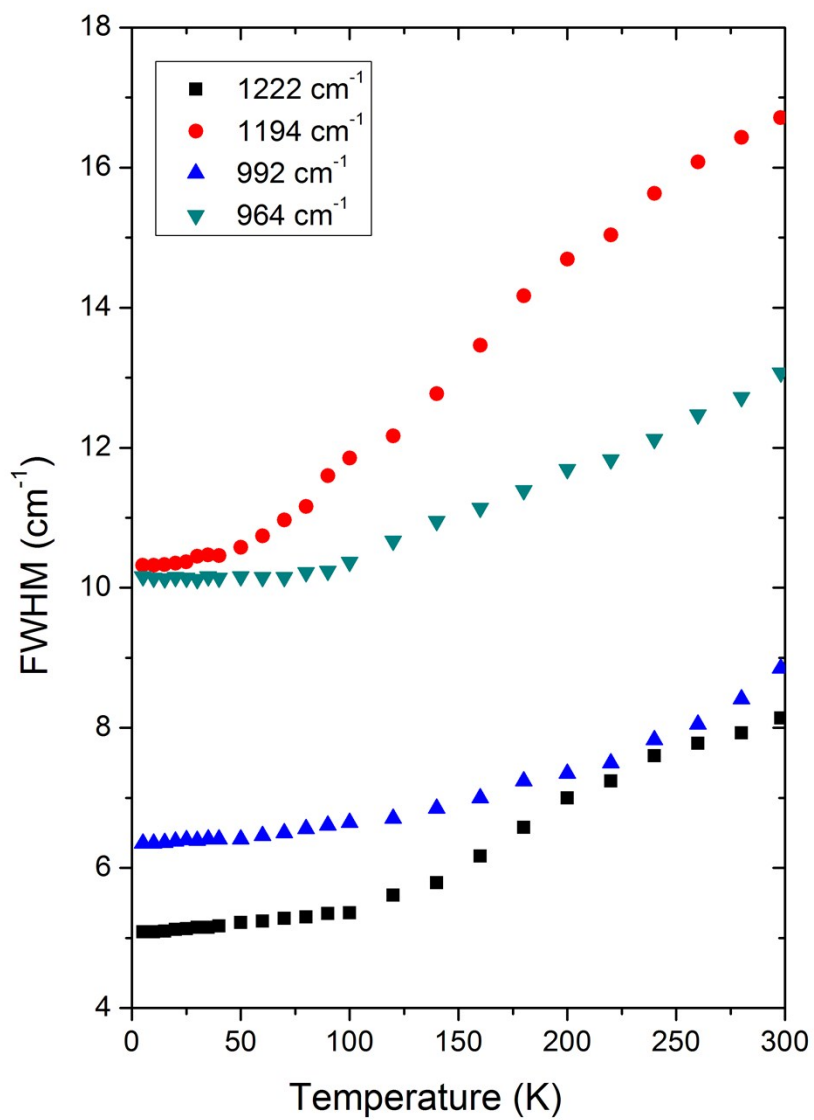

Figure S8. FWHM as a function of temperature for a few selected IR modes of **2**.

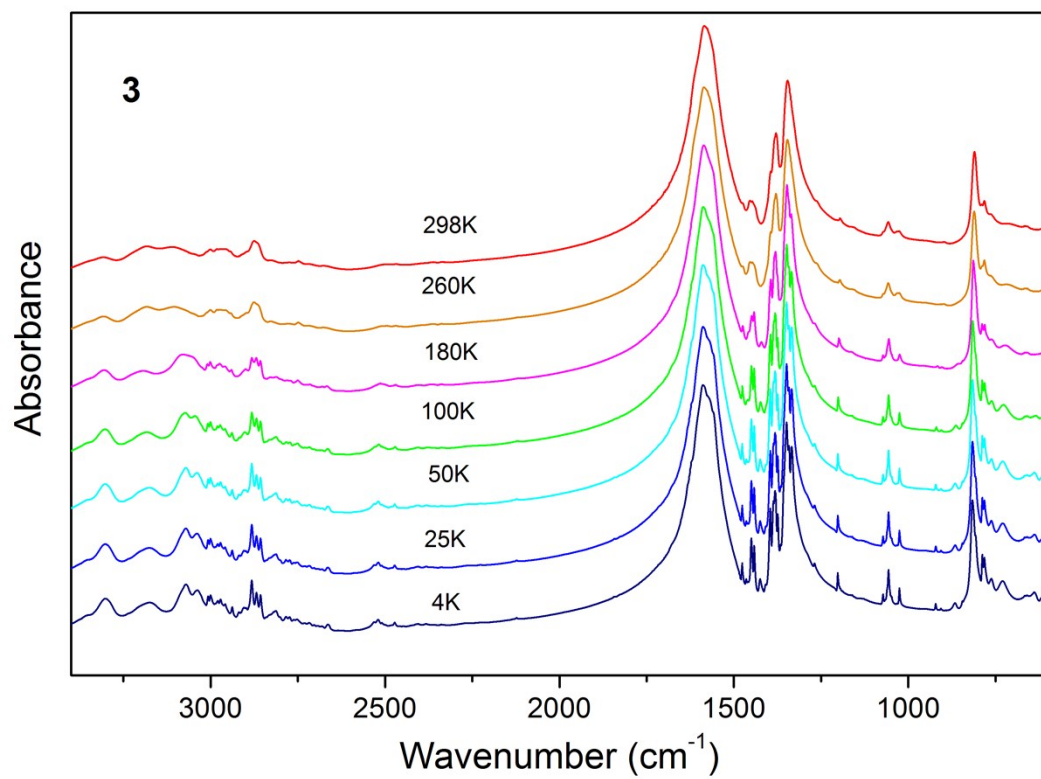

Figure S9. IR spectra of **3** recorded at various temperatures.

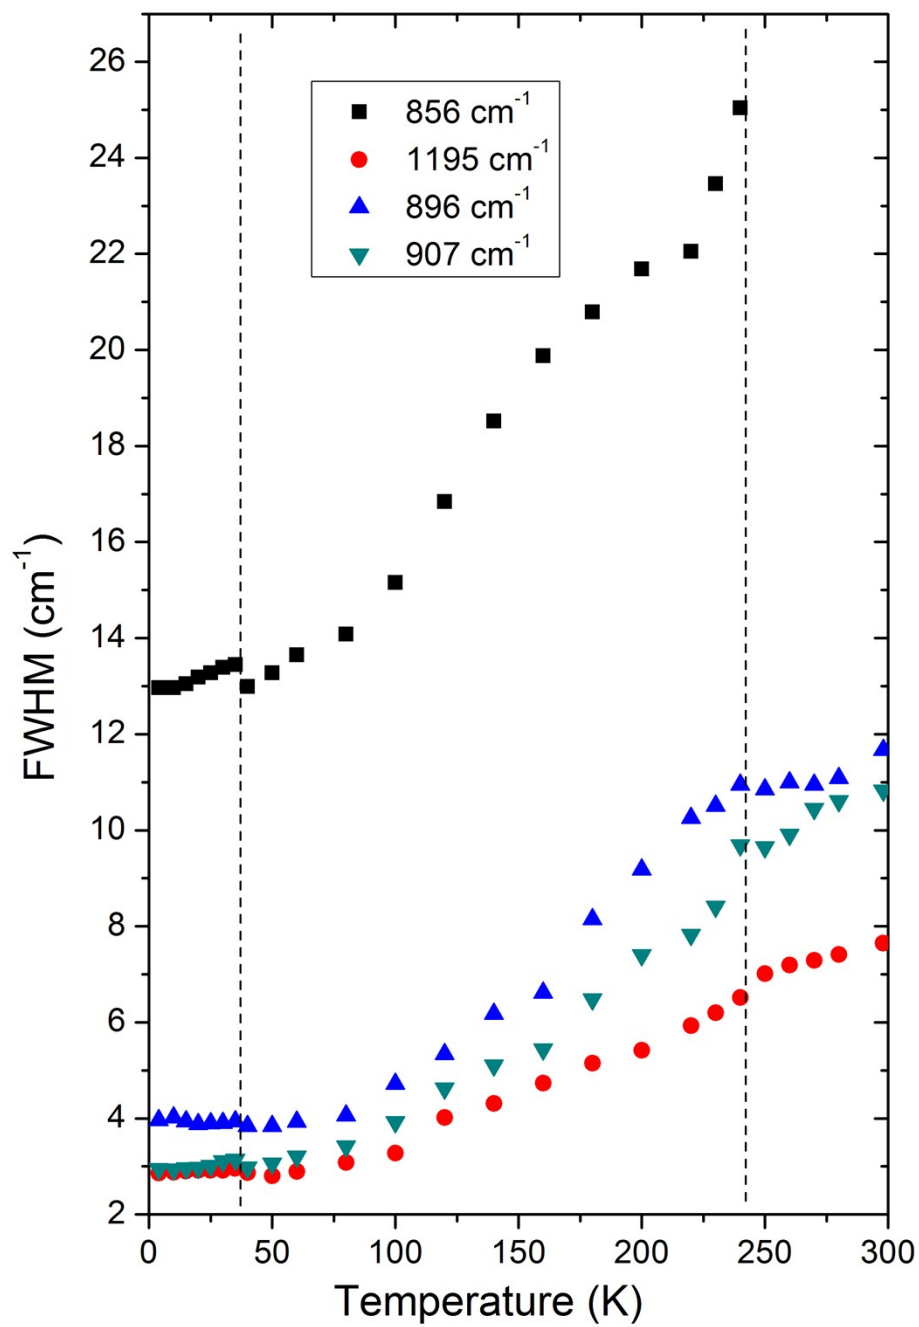

Figure S10. FWHM as a function of temperature for a few selected IR modes of **3**. Vertical lines indicate temperatures of the structural and magnetic phase transitions.
